# Supplementary material for: The Impact of Mild Chronic Stress and Maternal Experience in the Fmr1 Mouse Model of Fragile X Syndrome
Source: MDPI journal article supplement (doi:10.3390/ijms241411398), 2023-07-13
Supplement: s1 [file s1]

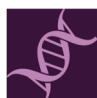

Article

# The Impact of Mild Chronic Stress and Maternal Experience in the *Fmr1* Mouse Model of Fragile X Syndrome

Enejda Subashi <sup>†</sup>, Valerie Lemaire <sup>†</sup>, Valeria Petroni and Susanna Pietropaolo <sup>\*</sup>

Univ. Bordeaux, CNRS, EPHE, INCIA, UMR 5287, F-33000 Bordeaux, France

<sup>\*</sup> Correspondence: susanna.pietropaolo@u-bordeaux.fr

<sup>†</sup> These authors contributed equally to this work.

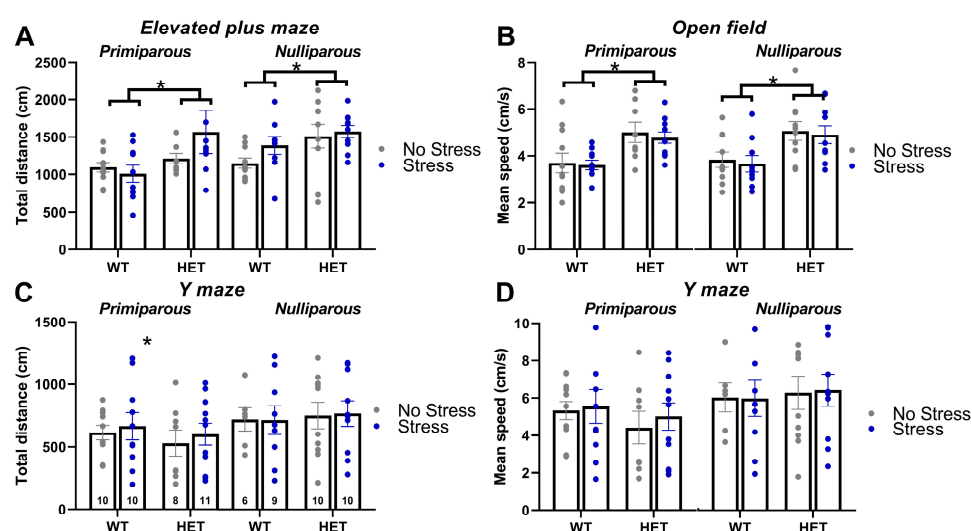

**Figure S1: Additional behavioral measures in anxiety and memory tests.** Locomotion and average speed were assessed in the elevated plus maze (A), open field (B), and during the test trial of the Y maze (C and D). Data are expressed as mean ± SEM. \*  $p < 0.05$ . N is indicated in C.
